# Supplementary material
Source: HighWire-hosted journal article supplement (https://www.jneurosci.org/highwire/filestream/599492/field_highwire_adjunct_files/5/SupplMatTable.pdf)
Supplement: SupplMatTable.pdf [file SupplMatTable.pdf]

| <b>Description</b>                                            | <b>Inter-NS interval</b> |
|---------------------------------------------------------------|--------------------------|
| Default model, see Table 1 for parameters                     | 954.89 (54.14)           |
| With delays in synaptic transmission                          | 1001.04 (4.56)           |
| With 10% inhibitory cells                                     | 1016.30 (69.57)          |
| With 20% inhibitory cells                                     | 1455.24 (125.30)         |
| With 30% inhibitory cells                                     | 1198.98 (79.84)          |
| Duration of refractory period $T_{reset}=1\text{ms}$          | 416.60 (27.23)           |
| Duration of refractory period $T_{reset}=1\text{ms}$          | 500.20 (11.39)           |
| Resting potential $V_{rest}=0.5\text{mV}$                     | 788.81 (47.89)           |
| Resting potential $V_{rest}=1.5\text{mV}$                     | 1397.34 (95.33)          |
| Maximal spike potential $V_{spike}=90\text{mV}$               | 1026.29 (64.87)          |
| Maximal spike potential $V_{spike}=110\text{mV}$              | 946.58 (53.68)           |
| Magnitude of synaptic potentiation $W_+=5$                    | 887.50 (99.87)           |
| Magnitude of synaptic potentiation $W_+=15$                   | 769.92 (41.71)           |
| Magnitude of synaptic depression $W_-=90$                     | 970.26 (47.26)           |
| Magnitude of synaptic depression $W_-=110$                    | 1024.73 (70.20)          |
| Time-course of synaptic potentiation in STDP $\tau_+=20$      | 1247.01 (133.22)         |
| Time-course of synaptic potentiation in STDP $\tau_+=40$      | 869.71 (53.33)           |
| Time-course of synaptic depression in STDP $\tau_-=50$        | 1028.42 (59.49)          |
| Time-course of synaptic depression in STDP $\tau_-=70$        | 1087.26 (81.47)          |
| Rise in postsynaptic potential $\tau_{rise}=0.5\text{ms}$     | 1272.80 (130.32)         |
| Rise in postsynaptic potential $\tau_{rise}=1.5\text{ms}$     | 378.68 (20.71)           |
| Decay of postsynaptic potential $\tau_{fall}=2\text{ms}$      | 1006.93 (40.53)          |
| Decay of postsynaptic potential $\tau_{fall}=4\text{ms}$      | 1188.13 (81.15)          |
| Spike threshold $V_{thresh}=15\text{mV}$                      | 204.28 (13.46)           |
| Spike threshold $V_{thresh}=21\text{mV}$                      | 191.39 (12.37)           |
| Tonic current $I_{tonic}=0.6\text{mV}$                        | 316.07 (28.28)           |
| Tonic current $I_{tonic}=1.6\text{mV}$                        | 1298.86 (165.36)         |
| Magnitude of postsynaptic potential $V_0=3\text{mV}$          | 1021.69 (48.50)          |
| Magnitude of postsynaptic potential $V_0=5\text{mV}$          | 828.64 (43.33)           |
| Reversal potential $E=-70\text{mV}$                           | 1051.11 (73.20)          |
| Reversal potential $E=-50\text{mV}$                           | 1418.05 (179.48)         |
| Magnitude of change in synaptic efficacies $\eta=0.3$         | 580.00 (176.20)          |
| Magnitude of change in synaptic efficacies $\eta=0.7$         | 384.56 (21.68)           |
| Randomly removing 10% of connections                          | 1528.13 (278.17)         |
| Stochastic noise added to membrane potential: range of [0,1]  | 839.87 (243.28)          |
| Stochastic noise added to membrane potential: range of [0,10] | 897.13 (140.02)          |
| Leakage conductance $g=0.005\text{pS}$                        | 89.08 (6.07)             |
| Leakage conductance $g=0.05\text{pS}$                         | 730.00 (390.64)          |

**Supplementary Material, Table 1.** Various parametric modifications do not alter the non-periodic nature of network spikes. Values in the table are averaged over inter-NS intervals. Values in parentheses are standard deviations. Each simulation lasted 5 minutes. Bootstrap reshuffling identified NSs (using time-bins of 1ms). Parameter values for the default simulation are found in Table 1 of main text. In the simulation with delays in synaptic transmission, all parameters are collapsed onto their mean, and the only source of heterogeneity among cells arises from delays in synaptic transmission (Izhikevich 2006). In simulations with inhibitory cells, a certain percentage of connections was randomly initialized to a negative value ( $w_{ij}=-1$ ) and was never modified by STDP.
